# Supplementary material for: Transcriptional Regulation of GDF15 by EGR1 Promotes Head and Neck Cancer Progression through a Positive Feedback Loop
Source: MDPI journal article supplement (doi:10.3390/ijms222011151), 2021-10-15
Supplement: s1 [file s1]

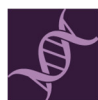

Supplementary table

## Transcriptional Regulation of GDF15 by EGR1 Promotes Head and Neck Cancer Progression through a Positive Feedback Loop

Table S1. The correlation of GDF15 expression with the clinical pathological characteristics of TCGA-HNC cohort.

| Characteristics                | No. of patients | GDF15 expression |                 |
|--------------------------------|-----------------|------------------|-----------------|
|                                |                 | Mean ± SD        | <i>p</i> -value |
| <b>Age, years</b>              |                 |                  |                 |
| ≤ 65                           | 277             | 6.26±2.05        | 0.363           |
| > 65                           | 144             | 6.06±2.15        |                 |
| <b>Gender</b>                  |                 |                  |                 |
| Male                           | 312             | 6.36±2.12        | 0.004*          |
| Female                         | 109             | 5.69±1.93        |                 |
| <b>Lymph vascular invasion</b> |                 |                  |                 |
| No                             | 189             | 5.94±2.01        | 0.004*          |
| Yes                            | 98              | 6.68±2.12        |                 |
| <b>Lymph node metastasis</b>   |                 |                  |                 |
| No                             | 197             | 6.08±2.18        | 0.232           |
| Yes                            | 217             | 6.33±2.02        |                 |
| <b>Neoplasm disease stage</b>  |                 |                  |                 |
| G1-G2                          | 298             | 6.01±2.11        | 0.038*          |
| G3-G4                          | 111             | 6.48±1.89        |                 |
| <b>T stage</b>                 |                 |                  |                 |
| T1-T2                          | 156             | 6.18±2.19        | 0.903           |
| T3-T4                          | 264             | 6.20±2.03        |                 |
| <b>TNM stage</b>               |                 |                  |                 |
| I + II                         | 91              | 5.79±1.91        | 0.038*          |
| III + IV                       | 330             | 6.30±2.13        |                 |
| <b>Alcohol consumption</b>     |                 |                  |                 |
| No                             | 126             | 6.00±2.23        | 0.279           |
| Yes                            | 286             | 6.25±2.04        |                 |
| <b>Survival</b>                |                 |                  |                 |
| Yes                            | 269             | 6.18±2.16        | 0.959           |
| No                             | 154             | 6.19±1.97        |                 |

TCGA-HNC, The Cancer Genome Atlas Head and Neck Cancer. \*  $p < 0.05$ .
