# Supplementary material for: Transcriptional Regulation of GDF15 by EGR1 Promotes Head and Neck Cancer Progression through a Positive Feedback Loop
Source: MDPI journal article supplement (doi:10.3390/ijms222011151), 2021-10-15
Supplement: s1 [file s1]

Supplementary data

# Transcriptional Regulation of GDF15 by EGR1 Promotes Head and Neck Cancer Progression through a Positive Feedback Loop

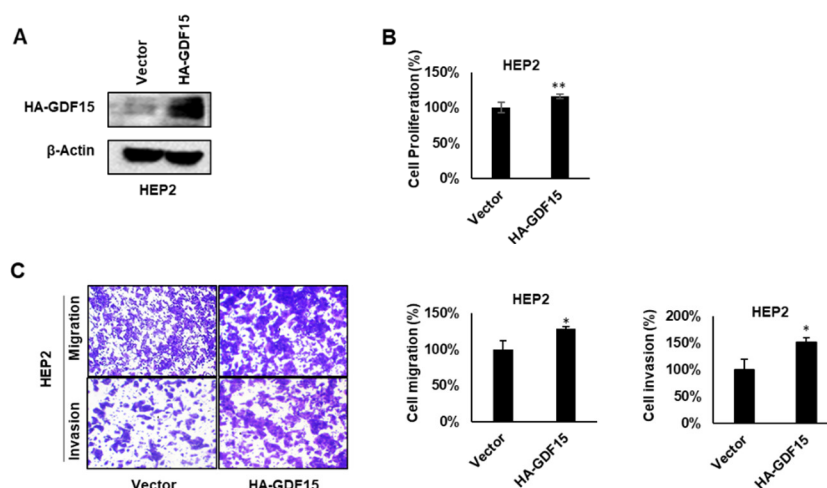

**Figure S1. Overexpression of GDF15 increases proliferation, migration, and invasion of HEP2 cells.** HEP2 cells were transiently transfected with HA-GDF15 overexpression vector or negative control for 24 h. After transfection, the expression of HA-GDF15 were evaluated by western blot analysis (A). Cell viability was then evaluated using the WST-1 assay (B). (C) After transfection, the cells were allowed to migrate for 24 h in Transwell chambers (cell migration) or for 48 hours in chambers coated with Matrigel (cell invasion). All experiments were repeated at least three times. Differences were considered significant at  $p < 0.05$  (\*  $p < 0.05$ , \*\*  $p < 0.01$ ).

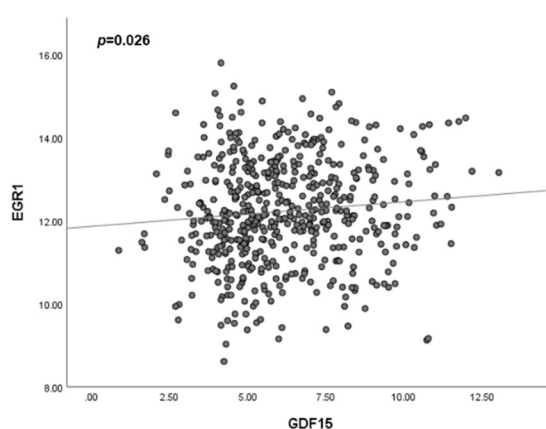

**Figure S2. Pearson correlation analysis confirmed that there was a statistically significant correlation between GDF15 and EGR1.** This result was obtained from TCGA HNC data.
